# Supplementary material for: Neural network embeddings based similarity search method for atomistic systems
Source: Royal Society of Chemistry journal article supplement (doi:10.1039/d2dd00055e), 2022-01-01
Supplement: d2dd00055e1.pdf [file d2dd00055e1.pdf]

# Journal Name

## ARTICLE TYPE

Cite this: DOI: 00.0000/xxxxxxxxxx

## Supporting information: Neural Network Embeddings based Similarity Search Method for Atomistic Systems

Yilin Yang,<sup>a‡</sup> Mingjie Liu,<sup>a‡</sup> and John R. Kitchin<sup>\*a</sup>

Received Date  
Accepted Date

DOI: 00.0000/xxxxxxxxxx

## Contents

|                                                           |           |
|-----------------------------------------------------------|-----------|
| <b>1 Hyperparamters</b>                                   | <b>1</b>  |
| 1.1 GemNet . . . . .                                      | 1         |
| 1.2 FAISS Index . . . . .                                 | 2         |
| 1.3 Flare GPR Model . . . . .                             | 2         |
| <b>2 Supplementary Examples for ANN Search</b>            | <b>2</b>  |
| 2.1 ANN Search Examples in QM9 . . . . .                  | 2         |
| 2.2 ANN Search Example in Materials Project . . . . .     | 6         |
| 2.3 Supporting Configurations for the OC20 Case . . . . . | 6         |
| 2.3.1 Search for O . . . . .                              | 7         |
| 2.3.2 Search for C <sub>2</sub> H <sub>2</sub> . . . . .  | 9         |
| <b>3 Data availability</b>                                | <b>10</b> |

## 1 Hyperparamters

### 1.1 GemNet

**Table 1** Hyperparameters for the GemNet model used in our work. More details about the hyperparameters can be found in the OC20 GitHub repository.

| Hyperparameter    | Value        | Hyperparameter  | Value               |
|-------------------|--------------|-----------------|---------------------|
| num_spherical     | 7            | num_radial      | 128                 |
| num_blocks        | 3            | emb_size_atom   | 128                 |
| emb_size_edge     | 128          | emb_size_trip   | 64                  |
| emb_size_rbf      | 16           | emb_size_cbf    | 16                  |
| emb_size_bil_trip | 64           | num_before_skip | 1                   |
| num_after_skip    | 2            | num_concat      | 1                   |
| num_atom          | 3            | cutoff          | 6.0                 |
| max_neighbors     | 50           | rbf             | gaussian            |
| envelope          | polynomial   | cbf             | spherical_harmonics |
| extensive         | true         | oft_graph       | false               |
| output_init       | heOrthogonal | activation      | silu                |
| regress_forces    | true         | direct_forces   | true                |

<sup>a</sup> Department of Chemical Engineering, Carnegie Mellon University, 5000 Forbes Ave, Pittsburgh, PA 15213; E-mail: jkitchin@andrew.cmu.edu

‡ These authors contributed equally to this work.

## 1.2 FAISS Index

Table 2 Hyperparameters for the Faiss IndexIVFPQ method. More details about the hyperparameters can be found in Faiss wiki.

| Hyperparameter                                   | Value       |
|--------------------------------------------------|-------------|
| Coarse Quantizer                                 | IndexFlatL2 |
| d (dimension)                                    | 128         |
| nlists (number of centroids in coarse quantizer) | 7000        |
| m (number of subvectors for division)            | 128         |
| nbits (encoding size for a subvector)            | 8           |

## 1.3 Flare GPR Model

Table 3 Hyperparameters for the Flare GPR model.

| Hyperparameter | Value                   |
|----------------|-------------------------|
| cutoff radius  | 3.7                     |
| descriptors    | two body and three body |
| kernel         | square kernel           |
| length scale   | 0.5                     |
| energy noise   | 0.005                   |
| force noise    | 0.005                   |
| stress noise   | 0.1                     |

## 2 Supplementary Examples for ANN Search

### 2.1 ANN Search Examples in QM9

Here we attach additional examples for searches done in QM9.

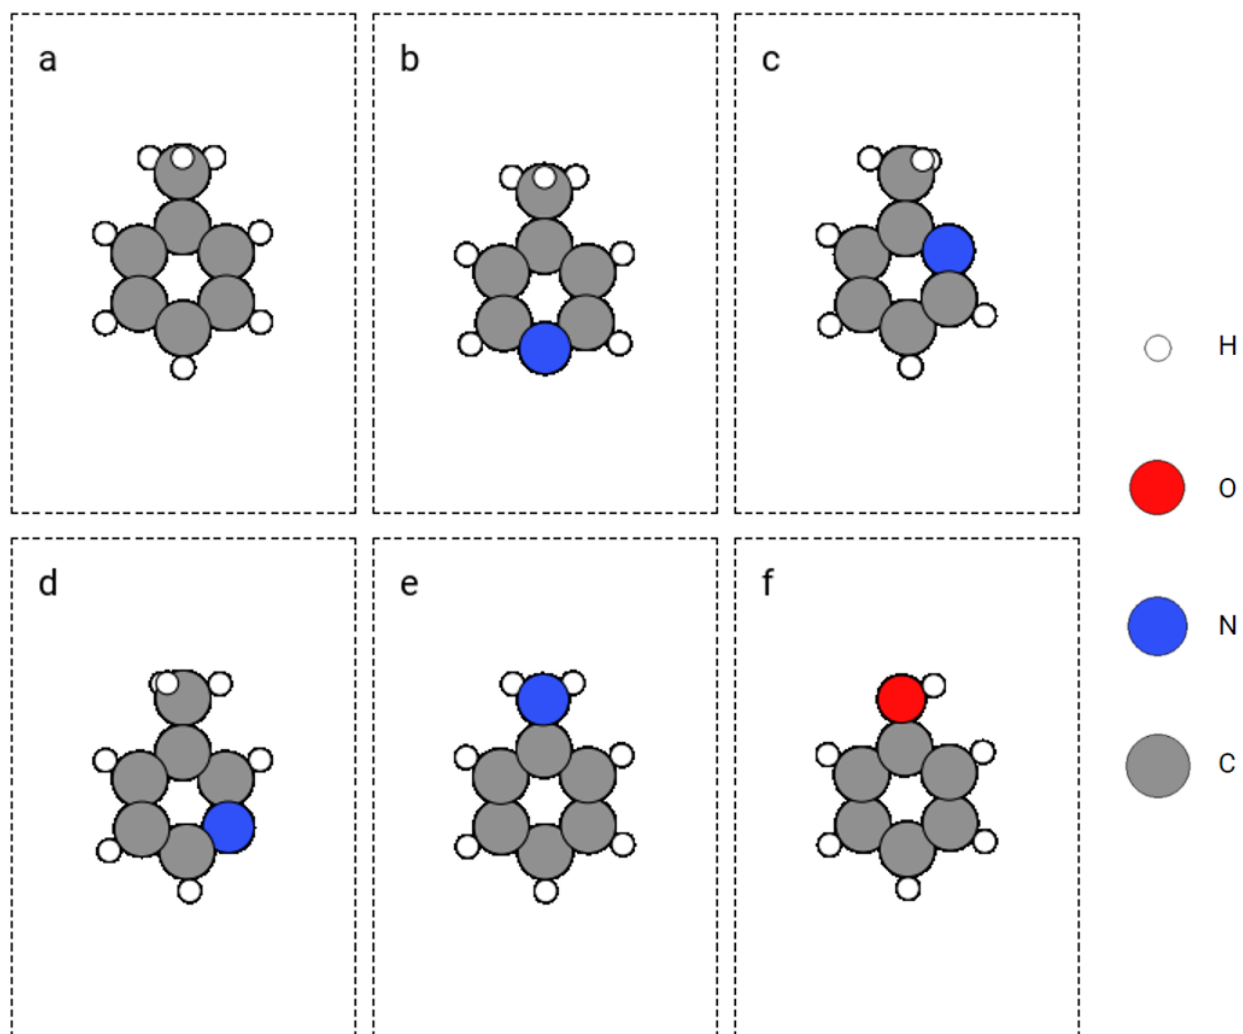

Fig. 1 Similar molecules (b to f) retrieved from querying toluene molecule (a).

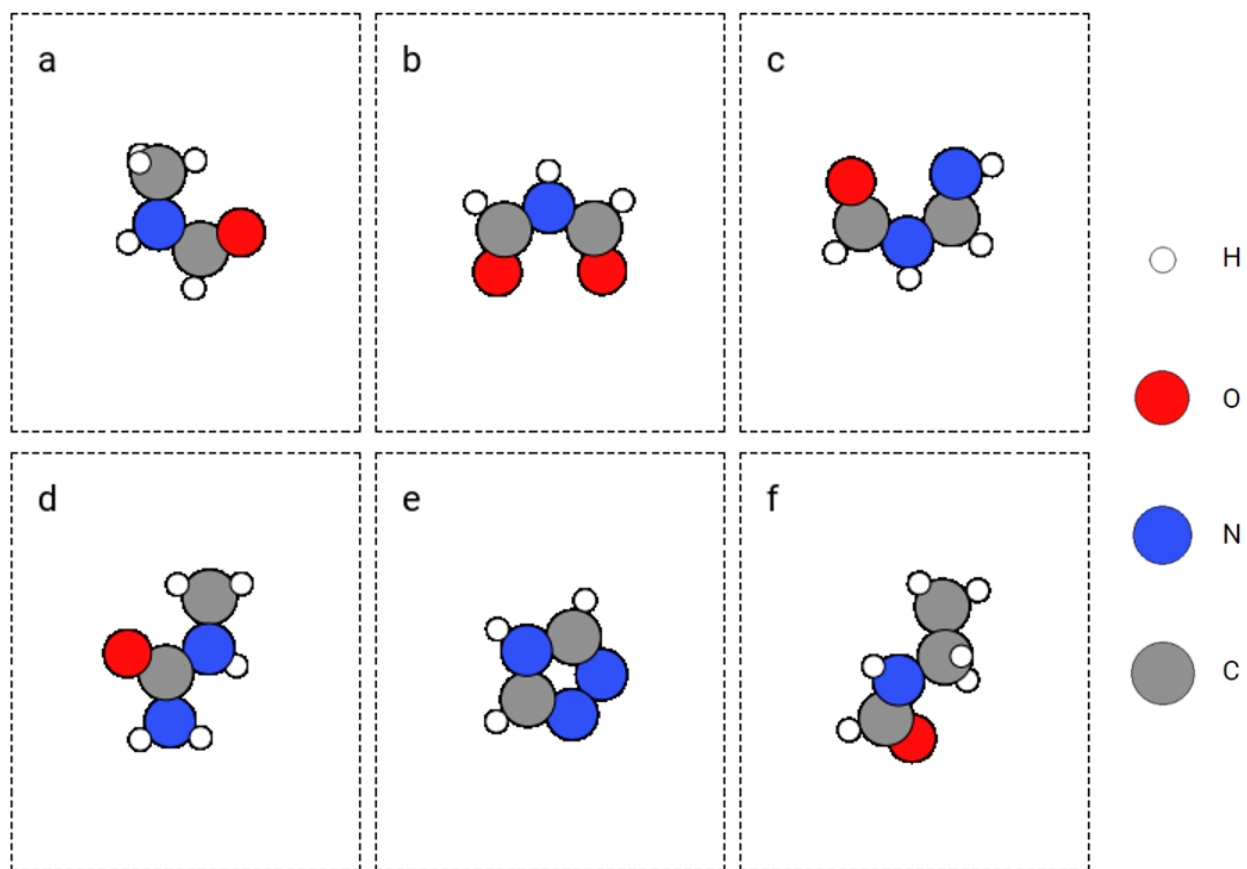

Fig. 2 Similar -N(H)- substructure (b to f) retrieved from querying -N(H)- substructure (a).

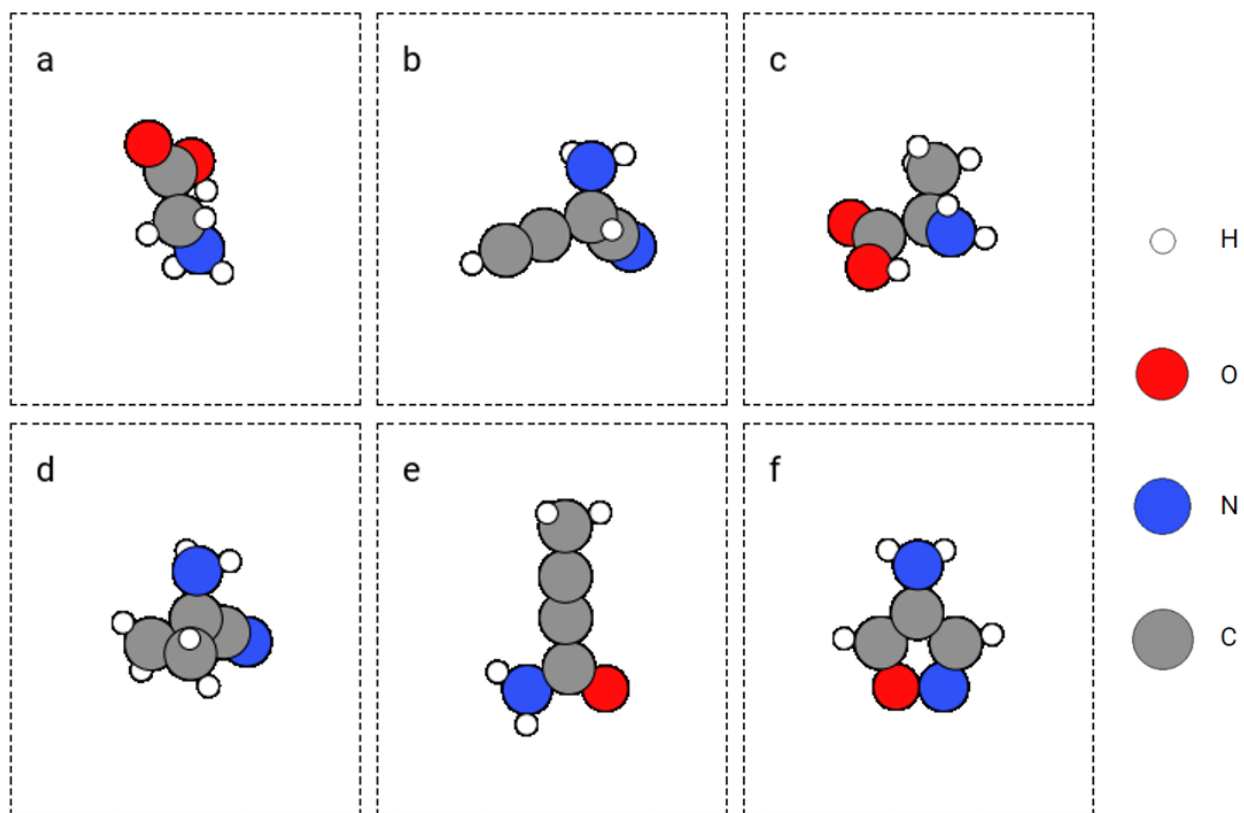

Fig. 3 Similar -NH<sub>2</sub> substructure (b to f) retrieved from querying -NH<sub>2</sub> substructure (a).

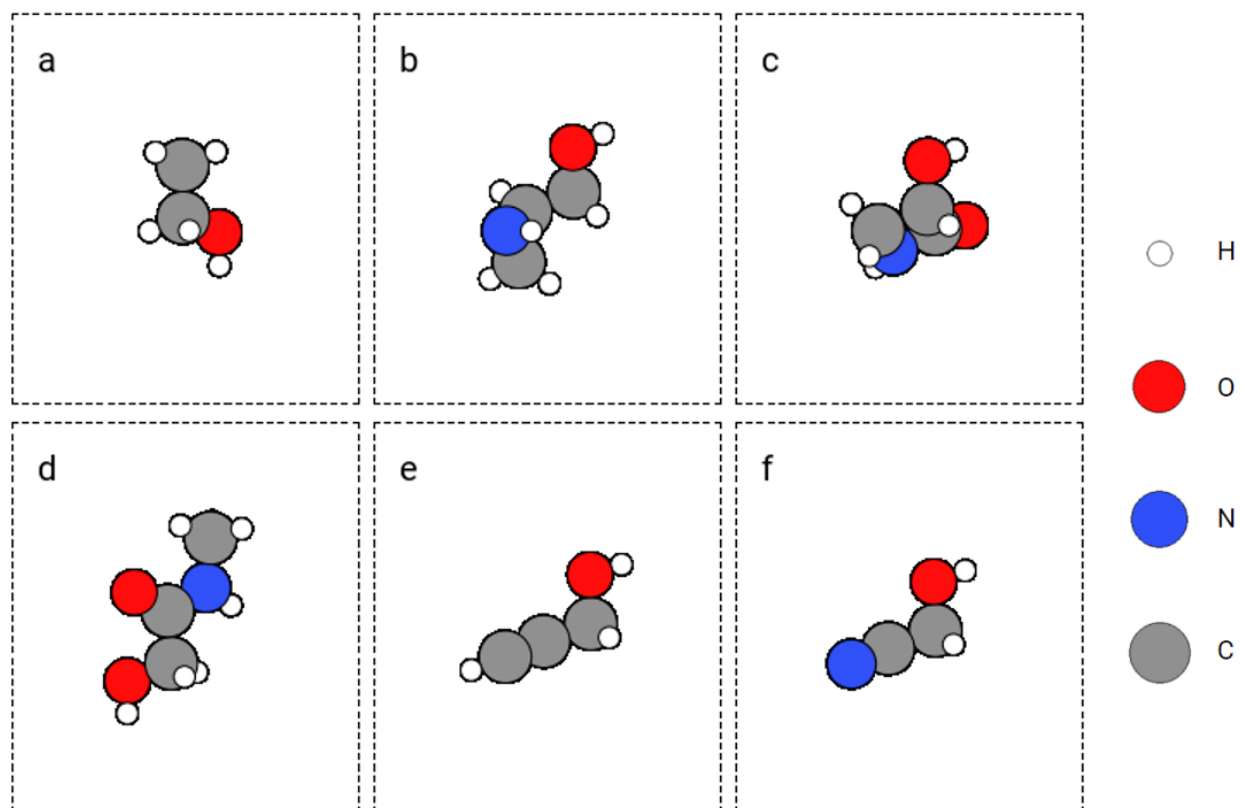

Fig. 4 Similar -OH substructure (b to f) retrieved from querying -OH substructure (a).

## 2.2 ANN Search Example in Materials Project

Here, we present another example using GemNet embedding and ANN to search for similar bulk environment in the Materials Project database. The query and searched atoms are shown in Figure 5. The query palladium atom (atom 2 in Figure 5 a) and two other palladium atoms (atom 3 and 4) form a hollow site and there is a zinc atom (atom 0) on this hollow site. The searched palladium atoms are all similar to the query palladium atom in terms of the atom arrangement and element type.

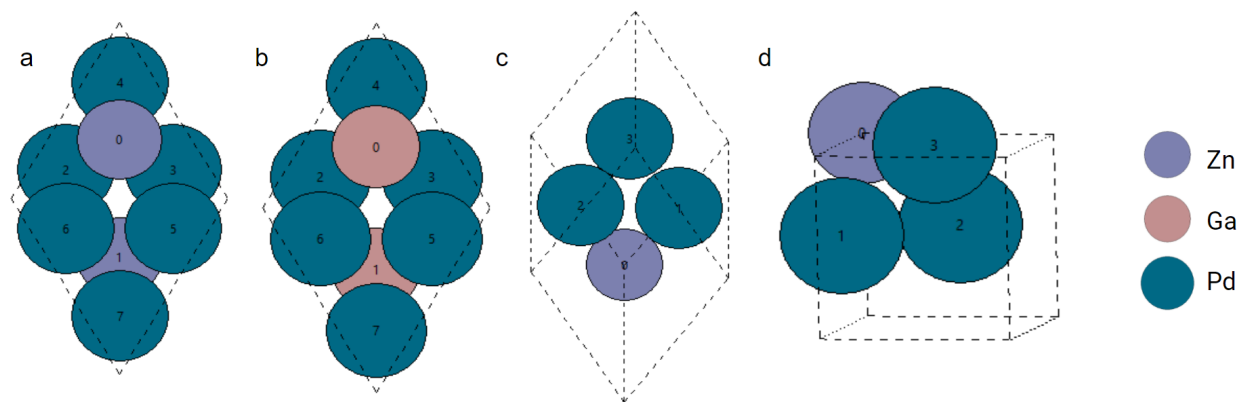

Fig. 5 Top 10 nearest atoms to a palladium query atom in the Materials Project dataset. Atom 2 in figure a is the query atom. Atom 2 to 7 in figure b, atom 1, 2 in figure c, and atom 1, 3 in figure d are the searched atoms.

## 2.3 Supporting Configurations for the OC20 Case

Here, we attached supporting configurations for the examples shown in the paper including the zoomed-in local configurations for the search results and the randomly selected configurations.

### 2.3.1 Search for O

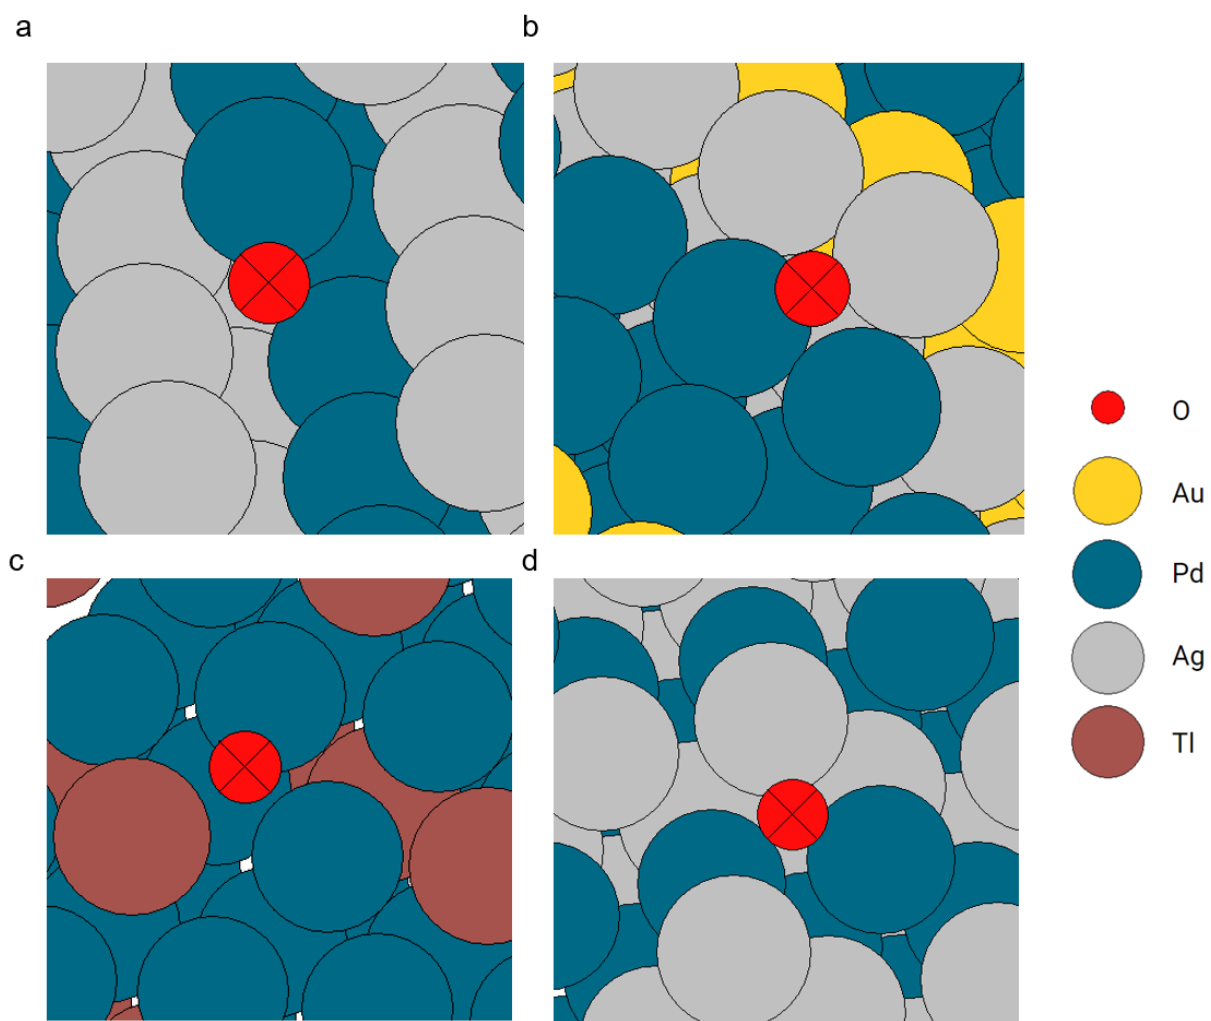

Fig. 6 Zoomed-in local configurations for the oxygen search example.

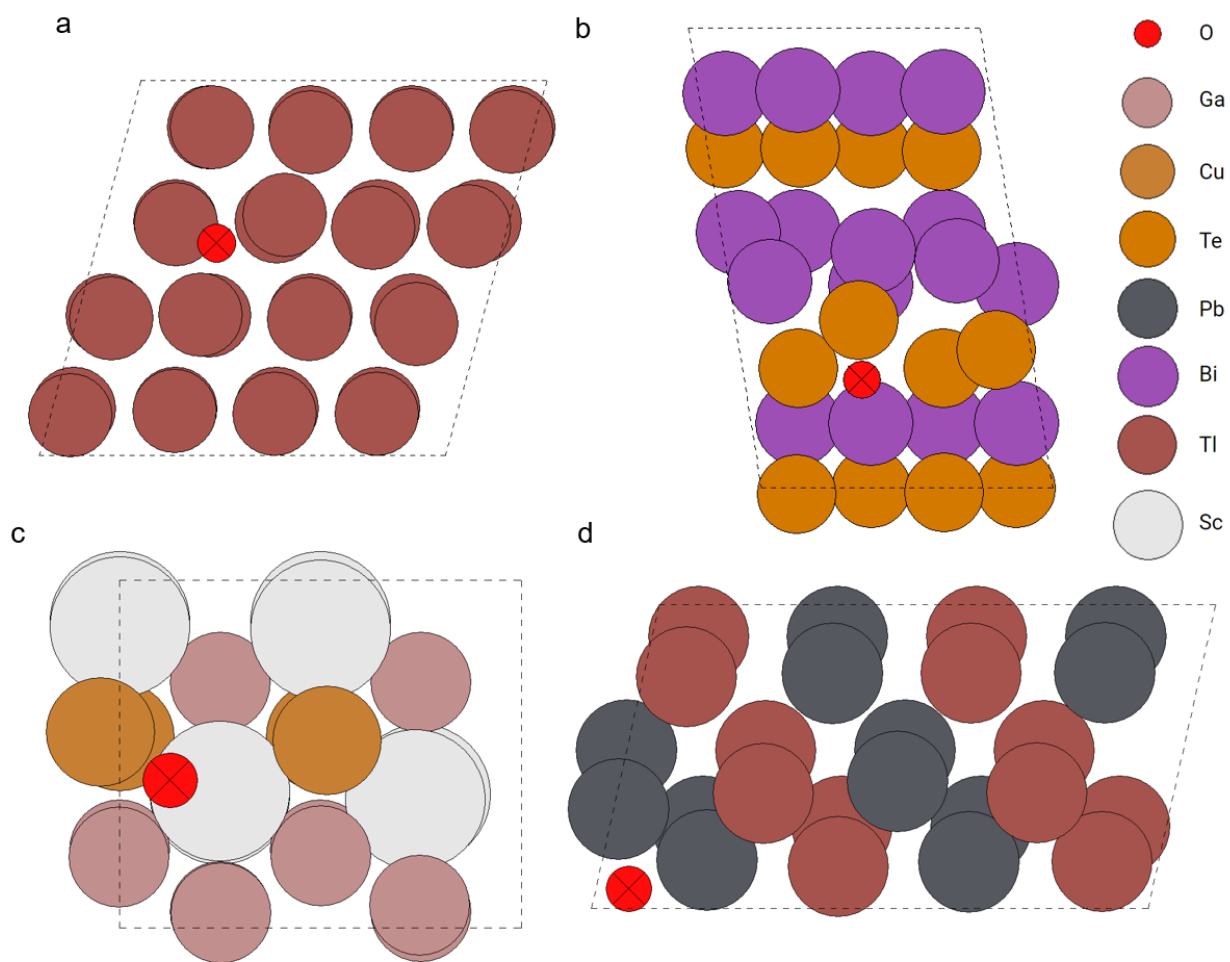

Fig. 7 Four randomly selected oxygen atoms in the OC20 dataset.



### 2.3.2 Search for $C_2H_2$

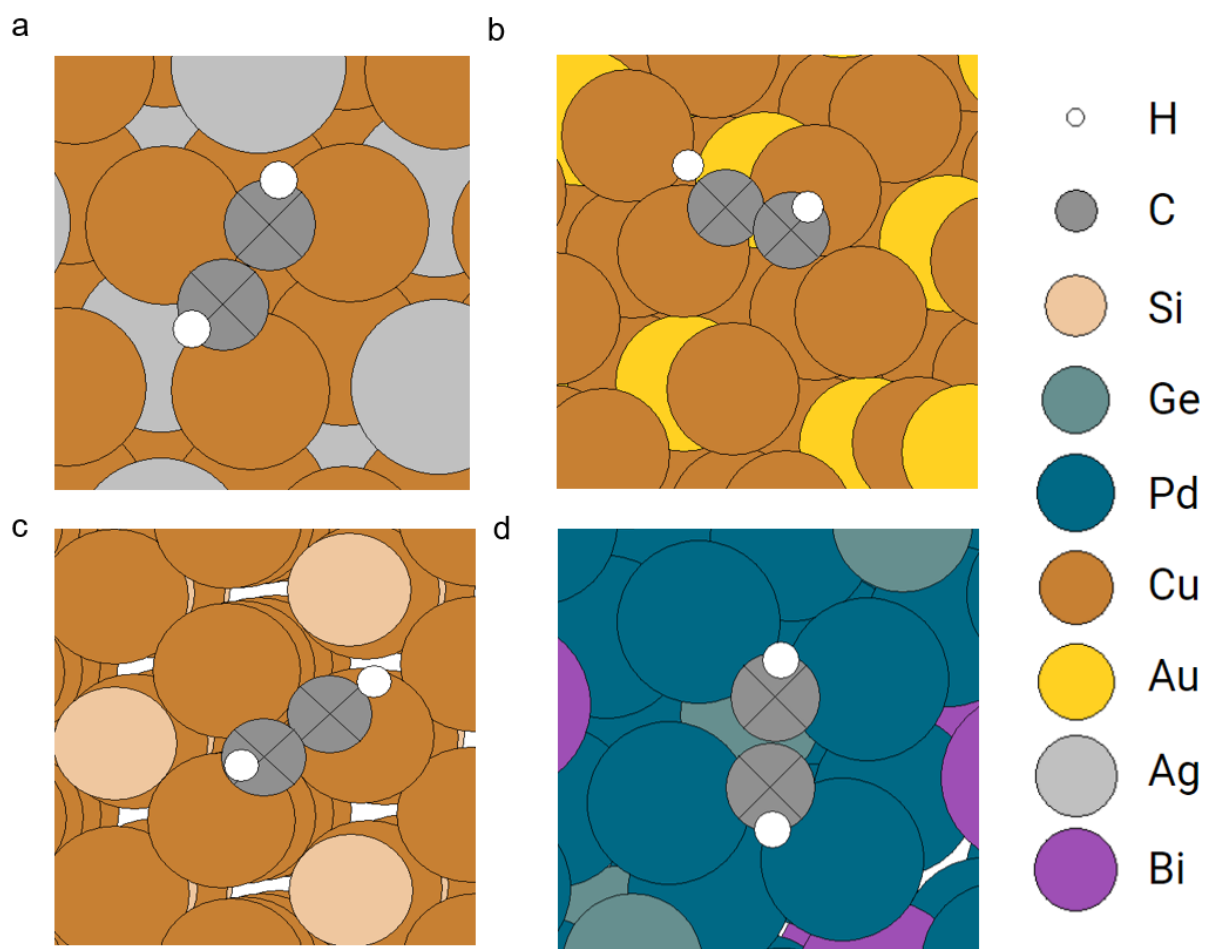

Fig. 8 Zoomed-in local configurations for the acetylene search example.

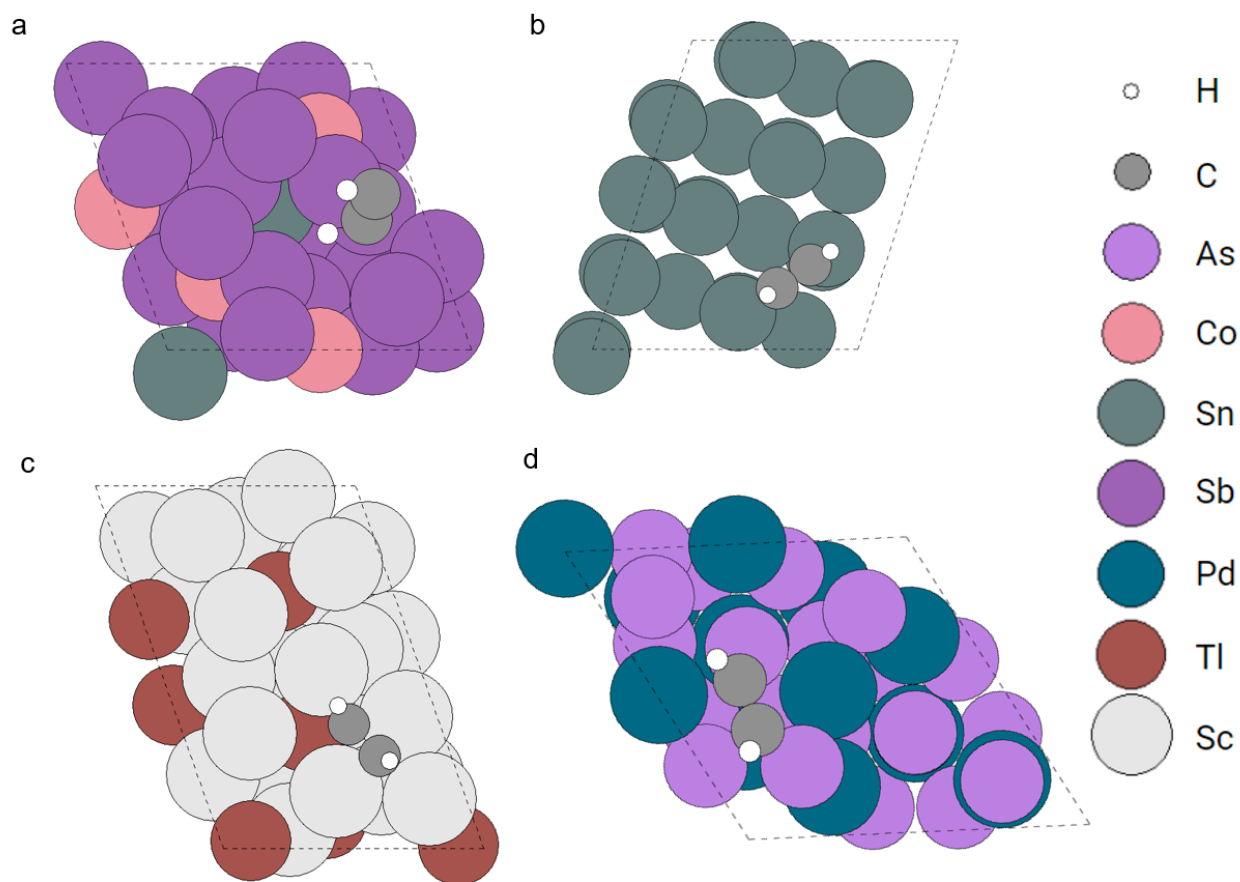

Fig. 9 Four randomly selected acetylene adsorption systems in the OC20 dataset.

### 3 Data availability

The data generated in this work is too large to completely share directly (it exceeds 80GB in total). Instead, we have created a data archive at <https://doi.org/10.1184/R1/19968323>. This archive contains about 20GB of data that were used in the QM9 and Materials Project examples. The OC20 dataset resulted in over 60 GB of index and other data. This data can be generated following the examples contained in the data archive.
